# Supplementary material
Source: PubMed Central journal article supplement (PMC4002763)
Supplement: NIHMS496343-supplement-Supp_Fig_S1.pdf [file NIHMS496343-supplement-Supp_Fig_S1.pdf]

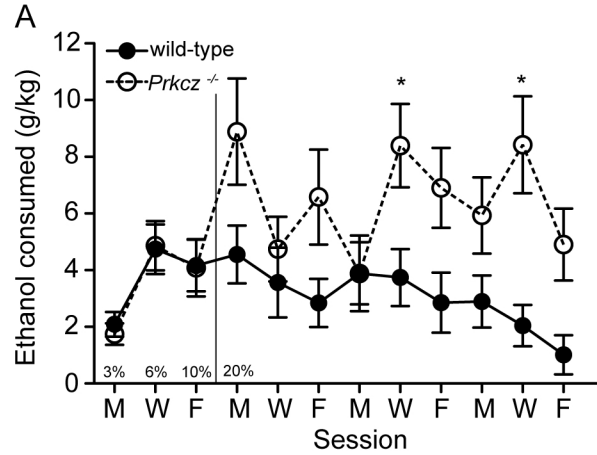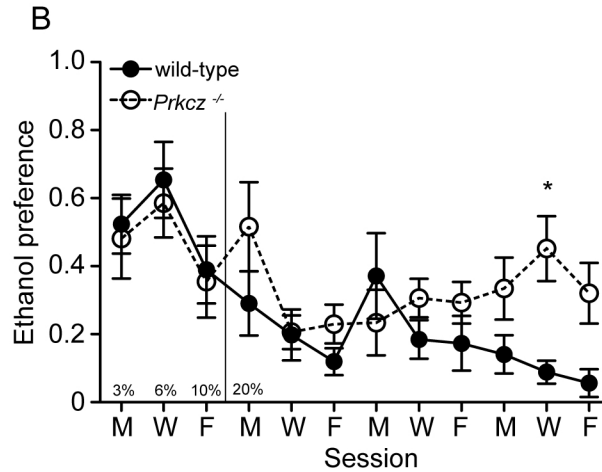

Supplementary Figure 1. (A) Ethanol consumption and (B) preference after the 24-hour intermittent consumption paradigm in the second cohort of *Prkc<sup>-/-</sup>* ( $n=11$ ) and wild-type mice ( $n=13$ ). \* $P<0.05$  compared with wild-type mice by a Bonferroni post-hoc test.
